# Supplementary material
Source: publisher site journal article supplement (https://www.spandidos-publications.com/6584/downloadSupplementary)
Supplement: Supplementary file 1 [file downloadSupplementary]

## Sheet: tumor volume
Table SIV. In vivo study tumor volume calculations.
Vehicle 1 and 2	Time (weeks)
#	0	0.5	1	1.5	2	2.5	3
5	222.071	299.433	349.044	460.243	534.071	537.212	664.578
15	367.566	484.983	574.257	973.108	1258.93	1487.02	1884.3
19	225.147	397.411	443.619	583.289	658.818	854.71	1083.52
42	308.923	419.403	705.68	764.192	1006.62	1075.73	1099.56
47	274.824	387.987	459.458	524.122	608.684	857.655	1114.22
55	311.541	458.28	871.792	1025.27	1613.01
71	207.934	299.106	509.723	643.241	919.832	1533.88
16	395.579	415.934	505.993	615.752	888.809	1052.11	1617.92
20	237.387	277.442	459.851	990.191	1250.75	1564.25
38	312.85	306.305	378.955	484.263	719.163	989.602	1503.25
40	279.798	413.512	479.878	650.048	814.523	1296.43	1541.08
48	236.536	333.794	366.519	510.116	647.168	1027.56	1246.17
63	227.962	351.727	507.367	735.133	1292.11	1979.2
ENZ	Time (weeks)
#	0	0.5	1	1.5	2	2.5	3
10	395.186	510.051	490.481	633.227	758.695	863.938	1305.59
17	309.84	321.228	484.394	684.867	1128.22	1462.02	2425.31
22	213.628	234.572	282.743	364.556	432.362	539.307	876.504
37	251.197	290.794	443.946	538.26	725.184	1129.93	1653.59
39	215.199	300.415	455.138	783.827	909.36	1479.82	1953.87
44	421.89	771.654	979.392	1770.88
50	245.437	413.643	467.181	746.128	1076.13	2277.65
51	294.524	442.114	549.321	762.36	1184.38	1740.44
54	232.085	553.706	1000.2	1786
60	345.052	534.071	728.849	965.778	1317.64	1405.6	1838.62
68	329.409	382.554	713.338	818.385	1053.74	1623.42
ADA-308 (25mg/kg)	Time (weeks)
#	0	0.5	1	1.5	2	2.5	3
1	347.931	668.177	668.112	720.472	866.032	930.435	922.843
6	216.77	236.143	266.381	289.812	326.726	362.265	483.282
7	201.062	181.1	187.383	176.06	197.92	205.185	247.4
14	194.19	235.619	239.808	260.49	250.673	232.478	221.875
25	365.603	613.003	841.947	966.171	944.441	1015.91	1084.24
32	227.137	564.898	522.29	786.511	680.678	663.4	753.393
33	225.213	221.482	324.5	297.47	301.593	290.597	329.867
56	232.871	494.801	551.35	643.699	672.432	834.158	854.121
57	281.434	334.121	480.14	581.326	747.437	907.92	1151.59
58	218.341	313.374	490.088	575.173	627.991	699.79	843.714
67	251.327	278.031	428.042
70	243.277	277.835	312.065	314.159	332.354	388.183	437.663
ADA-308 (50mg/kg)	Time (weeks)
#	0	0.5	1	1.5	2	2.5	3
3	460.309	641.409	787.362	728.588	630.675	688.009	740.238
8	228.813	214.414	214.414	226.98	251.851	290.205
9	269.653	306.829	327.249	322.799	474.904	526.217	546.375
11	253.487	260.556	276.198	289.812	343.023	342.826	384.452
12	364.687	393.746	692.459	635.911	659.734	738.274	738.274
13	416.457	702.735	892.54	1029.53	953.081	1072.07	1119.98
18	314.159	353.953	429.482	470.519	478.569	606.327	670.861
27	192.619	211.861	192.684	197.92	194.255	230.711	232.609
29	206.167	215.984	261.734	270.962	272.533	308.007	337.787
43	218.537	217.359	255.254	292.561	290.859	295.833	386.612
59	260.49	336.15	474.642	498.728	575.239	696.779	742.201
64	232.282	243.735	273.449	347.408	431.969	598.473	608.291
65	308.923	408.996	566.665	749.532	902.292	1210.76	1436.36
ODM-201	Time (weeks)
#	0	0.5	1	1.5	2	2.5	3
2	219.911	231.692	217.621	276.067	301.724	334.972	341.059
23	529.489	535.38	712.618	808.96	1049.29
30	215.199	218.864	242.95	248.709	233.591	266.512	267.166
31	193.797	279.471	331.503	370.053	460.243	512.472	629.955
35	322.995	471.828	576.482	631.002	678.322	675.77	892.932
41	281.696	607.113	551.219	552.92	725.97	720.996	712.094
45	204.204	277.835	322.013	384.845	484.591	514.043	544.281
46	366.61	403.197	487.431	715.131	1259.78	1347.02	1660.53
52	256.694	328.689	425.293	722.566	801.761	1011.07	1301.14
53	215.003	313.897	457.691	604.757	779.704	1137.65	1241.71
62	231.889	346.819	440.216	479.486	572.686	756.338	912.894
66	277.835	303.818	305.913	486.947	610.123	809.942	1003.22
69	247.4	401.404	498.204	564.898	744.165	793.776	863.938

## Sheet: tumor volume and dimentions
	Treatment		Left side (mm)				Right side (mm)			Total
z		Length	Width	Depth	Volume	Length	Width	Depth	Volume	volume
5	Vehicle	9.5	8	4	159.174	13.5	11	6.5	505.404	664.578
15	Vehicle	17.5	14.5	7	930.042	15	13.5	9	954.259	1884.3
19	Vehicle	8	8	3.5	117.286	7.5	5.5	3	64.7953	182.081
42	Vehicle	18	16	7	1055.58	7	4	3	43.9823	1099.56
47	Vehicle	19.5	17.5	9	1608.1				0	1608.1
55	Vehicle	14.5	12.5	6.5	616.865	13	10	6	408.407	1025.27
71	Vehicle	17	14	7	872.316	5.5	5.5	3	47.5166	919.832
16	Vehicle	11.5	8	5.5	264.941	19	16	8.5	1352.98	1617.92
20	Vehicle				0				0	0
38	Vehicle	11.5	11	4.5	298.059	16.5	15.5	9	1205.19	1503.25
40	Vehicle				0				0	0
48	Vehicle	12.5	10	4.5	294.524	5	5	3	39.2699	333.794
63	Vehicle	6	4.5	3	42.4115	14	13.5	7	692.721	735.133
10	ENZ	12	9	4	226.195	15.5	14	9.5	1079.4	1305.59
17	ENZ	21	19.5	11	2358.55	8.5	5	3	66.7588	2425.31
22	ENZ	11.5	9	4.5	243.866	10	8	4.5	188.496	432.362
37	ENZ	16.5	13.5	7.5	874.737	17	12.5	7	778.853	1653.59
39	ENZ	15.5	13	6	633.031	8	8	4.5	150.796	783.827
44	ENZ				0				0	0
50	ENZ	12.5	12	6	471.239	10.5	10	5	274.889	746.128
51	ENZ	6	5	4	62.8319	18	14	8.5	1121.55	1184.38
54	ENZ				0				0	0
60	ENZ	9.5	6	4.5	134.303	21	15.5	10	1704.31	1838.62
68	ENZ	10.5	6.5	4	142.942	19.5	14.5	10	1480.48	1623.42
1	ADA-308 (25mg/kg)	10	6	4	125.664	14.5	14	7.5	797.179	922.843
6	ADA-308 (25mg/kg)	12	9.5	4	238.761	8	6	3.5	87.9646	326.726
7	ADA-308 (25mg/kg)	10	6	4	125.664	5.5	5	3.5	50.3964	176.06
14	ADA-308 (25mg/kg)	9	7.5	4.5	159.043	8	5	3	62.8319	221.875
25	ADA-308 (25mg/kg)	17	15.5	7.5	1034.76	7	4.5	3	49.4801	1084.24
32	ADA-308 (25mg/kg)	11.5	4.5	3.5	94.8368	15	14	8	879.646	974.483
33	ADA-308 (25mg/kg)	8	7.5	4.5	141.372	10	8	4.5	188.496	329.867
56	ADA-308 (25mg/kg)	4.5	4	3	28.2743	10	7	4	146.608	174.882
57	ADA-308 (25mg/kg)	12	10.5	5	329.867	15.5	13.5	7.5	821.723	1151.59
58	ADA-308 (25mg/kg)	13	6	4	163.363	7	5	3	54.9779	218.341
67	ADA-308 (25mg/kg)				0				0	0
70	ADA-308 (25mg/kg)	10	5.5	4	115.192	9.5	8	5	198.968	314.159
3	ADA-308 (50mg/kg)	13	9.5	4.5	290.99	13	11	6	449.248	740.238
8	ADA-308 (50mg/kg)	11.5	6	4	144.513	7.5	6	3.5	82.4668	226.98
9	ADA-308 (50mg/kg)	6	4.5	3	42.4115	12.5	11	7	503.964	546.375
11	ADA-308 (50mg/kg)	12	7	4.5	197.92	9.5	7.5	5	186.532	384.452
12	ADA-308 (50mg/kg)	10.5	8	5	219.911	12	11	7.5	518.363	738.274
13	ADA-308 (50mg/kg)	8	6	4.5	113.097	15.5	14.5	9.5	1117.95	1231.05
18	ADA-308 (50mg/kg)	13.5	8.5	4	240.332	13	11.5	5.5	430.529	670.861
27	ADA-308 (50mg/kg)	7.5	5.5	5	107.992	8.5	7	4	124.617	232.609
29	ADA-308 (50mg/kg)	8.5	6.5	4.5	130.18	6	4.5	3	42.4115	172.591
43	ADA-308 (50mg/kg)	11	8	5	230.383	7	5.5	3	60.4757	290.859
59	ADA-308 (50mg/kg)	12.5	7.5	4	196.35	7	5	3.5	64.1409	260.49
64	ADA-308 (50mg/kg)	11.5	6.5	4	156.556	9	9	4.5	190.852	347.408
65	ADA-308 (50mg/kg)	7	6.5	3.5	83.3831	16	11.5	8.5	818.908	902.292
2	ODM-201	13.5	6	4.5	190.852	8.5	7.5	4.5	150.207	341.059
23	ODM-201				0				0	0
30	ODM-201	11.5	5.5	4	132.47	10.5	7	3.5	134.696	267.166
31	ODM-201	12	9.5	5.5	328.296	10.5	6	4	131.947	460.243
35	ODM-201	16.5	14.5	7	876.897	3.5	3.5	2.5	16.0352	892.932
41	ODM-201	14	13	7	667.065	10	5	3	78.5398	745.605
45	ODM-201	10	7	4.5	164.934	5	5	3	39.2699	204.204
46	ODM-201	10	6	5	157.08	19.5	15.5	9.5	1503.45	1660.53
52	ODM-201	12	5.5	3.5	120.951	17	12.5	8	890.118	1011.07
53	ODM-201	11.5	10.5	5.5	347.735	10	6	3.5	109.956	457.691
62	ODM-201	11	8.5	4.5	220.304	11	9	5	259.181	479.486
66	ODM-201	10	5	4	104.72	16.5	13	8	898.495	1003.22
69	ODM-201	9.5	6.5	4	129.329	5	5	3	39.2699	168.599

## Sheet: tumor volume study 2
Vehicle	Time (weeks)
#	0	0.5	1	1.5	2	2.5
1	200	210	320	380	460	500
2	210	270	490	1070	1300	0
3	200	270	510	870	1320	2000
4	200	350	500	780	1640	0
5	230	300	540	840	1160	1370
6	220	420	530	970	1140	1360
7	220	280	440	530	770	810
8	200	220	400	690	910	1050
9	190	330	380	620	1300	2550
10	200	250	250	320	350	450
ENZ	Time (weeks)
#	0	0.5	1	1.5	2	2.5
1	220	230	350	610	900	1350
2	190	320	440	590	780	960
3	220	340	740	930	1520	0
4	230	930	1430	0	0	0
5	220	300	560	1230	2710	0
6	230	640	850	960	1470	1890
7	220	230	420	540	810	1730
8	230	350	610	1010	1790	0
9	210	310	550	1680	0	0
10	220	400	480	950	1160	1610
11	190	230	430	580	850	1650
ADA-308 (12.5mg/kg)	Time (weeks)
#	0	0.5	1	1.5	2	2.5
1	210	300	450	740	1650	0
2	210	270	310	400	530	650
3	200	400	510	620	800	920
4	200	260	400	690	900	1220
5	190	300	310	320	380	570
6	210	340	710	710	550	350
7	220	260	490	520	700	0
8	230	250	390	420	580	580
9	200	220	390	790	990	840
10	200	290	370	580	690	700
ADA-308 (25mg/kg)	Time (weeks)
#	0	0.5	1	1.5	2	2.5
1	190	240	370	430	720	860
2	210	290	410	420	450	290
3	220	800	1270	1970	0	0
4	210	460	720	780	870	1510
5	220	610	350	860	600	640
6	200	230	540	680	970	1400
7	190	320	370	520	500	470
8	210	220	330	410	530	550
9	190	260	390	400	450	470
10	220	370	590	660	560	440
11	210	220	570	620	690	980
12	210	270	390	530	620	650
ODM-201	Time (weeks)
#	0	0.5	1	1.5	2	2.5
1	220	340	470	530	680	710
2	200	240	350	530	630	700
3	200	220	320	650	730	880
4	200	220	250	170	130	310
5	200	240	290	300	660	460
6	200	200	710	570	500	720
7	210	300	520	540	890	780
8	220	220	380	450	460	700
9	200	370	400	350	340	230
10	190	360	550	860	1140	1510
11	220	420	490	560	690	450
